# Supplementary material for: Resource-efficient pre-treatment with partial desalination approach using graphene-MXene coated cellulose filters for desalination plants
Source: Royal Society of Chemistry journal article supplement (doi:10.1039/d5na00691k), 2025-11-25
Supplement: d5na00691k1.pdf [file d5na00691k1.pdf]

**Electronic Supplementary Information (ESI\*)**

**Resource-efficient Pre-Treatment with Partial Desalination Approach Using Graphene-MXene Coated Cellulose Filters for Desalination Plants**

Madhusudhana M. Devadiga<sup>a</sup>, Anushree S. Bhat<sup>a</sup>, Subham Sarangi<sup>a</sup>, Anil Kumar H.S<sup>b</sup>, Nannan Wang<sup>c</sup>, Santosh K. Tiwari<sup>a\*</sup>

**Correspondence to**

Prof. Santosh K. Tiwari,

**Email:** [ismgraphene@gmail.com](mailto:ismgraphene@gmail.com) / [santosh.tiwari@nitte.edu.in](mailto:santosh.tiwari@nitte.edu.in)

| Sl. No | Method used                   | Principle                                                                                                                                  | Advantages                                                                                      | Disadvantages                                                     | Ref. |
|--------|-------------------------------|--------------------------------------------------------------------------------------------------------------------------------------------|-------------------------------------------------------------------------------------------------|-------------------------------------------------------------------|------|
| 1      | Coagulation & Flocculation    | Addition of chemicals (e.g., FeCl <sub>3</sub> , Al <sub>2</sub> (SO <sub>4</sub> ) <sub>3</sub> ) to destabilize particles and form flocs | Removes suspended solids, Cost-effective, Improves downstream filtration                        | Produces sludge, requires precise chemical dosing                 | [1]  |
| 2      | Cartridge Filtration          | Depth filtration using porous cartridges (typically 5 µm)                                                                                  | Compact, Easy replacement, protects RO membranes                                                | Requires frequent replacement, Limited capacity for large volumes | [2]  |
| 3      | Ultrafiltration (UF)          | Membrane filtration that removes particles, colloids, and bacteria (pore size ~0.01 µm)                                                    | High efficiency, removes viruses, Stable feed for RO                                            | High initial cost, Membrane fouling, needs cleaning               | [3]  |
| 4      | Microfiltration (MF)          | Membranes with larger pore size (~0.1 µm) for particle and microorganism removal                                                           | Reduces biofouling, Low-pressure operation                                                      | Cannot remove dissolved salts or organics, Fouling risk           | [4]  |
| 5      | Dissolved Air Flotation (DAF) | Air bubbles attach to suspended particles, which float and are skimmed                                                                     | Effective for algae and oil, Less sludge than coagulation                                       | Requires a large area, not efficient for very small particles     | [5]  |
| 6      | Chlorination/Dichlorination   | Chlorine is added to kill microorganisms; sodium bisulfite is used before RO to neutralise chlorine                                        | Controls biofouling, Cost-effective                                                             | Chlorine damages RO membranes, generates harmful by-products      | [6]  |
| 7      | Acid Addition (pH Adjustment) | Acid (e.g., H <sub>2</sub> SO <sub>4</sub> ) lowers pH to reduce scale formation                                                           | Prevents scaling (especially CaCO <sub>3</sub> ), Enhances antiscalant performance              | Corrosive, pH must be carefully controlled                        | [7]  |
| 8      | Antiscalant Dosing            | Polyphosphates or polymers inhibit the crystal formation of scale-forming salts                                                            | Minimises scaling, Enhances RO recovery                                                         | Potential biofouling must be dosed precisely                      | [8]  |
| 9      | Our method                    | Gravity-driven filtration, modified adsorbates with a hybrid sandwich-like arrangement.                                                    | Zero energy requirement, no hazardous chemicals, eco-friendly, dual purpose and cost-effective. | Relatively low water flux, need for replacement of the materials. | --   |

**Table S1.** Commercially available pretreatment methods and their working principle, along with pros and cons.

| Pretreatment method                                                                                                              | Parameters studied                                                                  | Results                                                                                                                                | Advantages                                                                                 | Limitations                                                                                       | Ref.         |
|----------------------------------------------------------------------------------------------------------------------------------|-------------------------------------------------------------------------------------|----------------------------------------------------------------------------------------------------------------------------------------|--------------------------------------------------------------------------------------------|---------------------------------------------------------------------------------------------------|--------------|
| Ultrafiltration (UF)                                                                                                             | SDI, turbidity, particle removal, biofouling                                        | - SDI <3<br>- Effective particle/microbe removal<br>- Stable flux                                                                      | - High particle/microbe removal<br>- Improved RO feed quality                              | - Membrane fouling over long-term<br>- Chemical cleaning needed                                   | [9]          |
| Pilot-scale dual-media filtration                                                                                                | SDI, MFI, RO performance, fouling                                                   | - SDI <3<br>- Satisfied pilot-scale performance                                                                                        | - Proven pilot-scale<br>- Low fouling risk                                                 | - Site-specific<br>- Chemical addition may be needed                                              | [10]         |
| Dual media rapid filtration                                                                                                      | Fouling fractionation, turbidity                                                    | - >80% particulate fouling removed                                                                                                     | - Simple<br>- Proven technique                                                             | - Limited organic removal<br>- Fouling can occur                                                  | [11]         |
| Ceramic UF                                                                                                                       | SDI, DOC, particle removal                                                          | - Robust removal of particulates<br>- SDI < 3                                                                                          | - High chemical/thermal stability<br>- Long life                                           | - High initial cost<br>- Energy demand                                                            | [12]         |
| Gravity-driven membrane (GDM) filtration                                                                                         | Permeate flux, AOC removal, biofilm                                                 | - Flux ~9.1 L/m <sup>2</sup> h<br>- AOC removal ~50–55%                                                                                | - Low energy<br>- Biofilm enhances organics removal                                        | - Lab-scale only<br>- Low flux<br>- Long-term biofilm control                                     | [13]         |
| Pre-chlorination + GDM                                                                                                           | Flux, fouling, microbial removal                                                    | - Flux increased 15–68%<br>- Reduced EPS                                                                                               | - Enhanced flux<br>- Microbial safety                                                      | - Long-term stability issues<br>- Chemical addition                                               | [14]         |
| Softening + Ballasted Flocculation (SBF)                                                                                         | Ca <sup>2+</sup> /Mg <sup>2+</sup> removal, SDI, settling velocity                  | - Settling velocity ~3.5 cm/s<br>- SDI <3<br>- Sludge reduced 76.5%                                                                    | - Rapid removal of Ca <sup>2+</sup> /Mg <sup>2+</sup><br>- Reduced RO fouling              | - Chemical addition<br>- Sludge handling required<br>- Other foulants not fully removed           | [15]         |
| Fibre media filtration                                                                                                           | SDI, MFI, turbidity, organics                                                       | - SDI ~2.6<br>- MFI ~1.4 s/L <sup>2</sup><br>- Turbidity <0.35 NTU                                                                     | - High velocity<br>- Compact footprint<br>- Organic/particle removal                       | - Maintenance and chemical dosing required                                                        | [16]         |
| Graphene oxide (GO/rGO) membrane-based filtration                                                                                | Ca <sup>2+</sup> /Mg <sup>2+</sup> rejection, flux, TBT                             | - TBT increased to 166 °C<br>- Improved divalent rejection                                                                             | - Reduced scaling<br>- Improved thermal efficiency                                         | - Limited to lab-scale<br>- Cost<br>- Other fouling not addressed                                 | [17]         |
| Flat sheet PVDF GDM                                                                                                              | Flux, biofilm properties, DOC                                                       | - Flux ~7.3–8.4 L/m <sup>2</sup> .h<br>- Biofilm porosity correlates with flux                                                         | - Low-energy<br>- Biofilm can enhance flux stability                                       | - Modest flux<br>- Limited DOC removal<br>- Pilot scale                                           | [18]         |
| Fibre filter + Dual media                                                                                                        | SDI, MFI, DOC, turbidity                                                            | - SDI ~2.6<br>- MFI ~1.4 s/L <sup>2</sup><br>- DOC reduced ~70%<br>- Turbidity <0.35 NTU                                               | - High feedwater quality<br>- Compact footprint<br>- Coagulation improves performance      | - Chemical addition<br>- pilot scale<br>- Other fouling agents are not fully addressed            | [19]         |
| Submerged membrane hybrid system                                                                                                 | Flux, fouling mechanisms, SDI                                                       | - Pore blocking & cake formation dominate<br>- Optimized operation reduced fouling                                                     | - Improved RO feedwater quality<br>- Understanding fouling mechanisms                      | - Pilot scale<br>- Complex<br>- Higher CAPEX/maintenance                                          | [20]         |
| Hybrid filtration setup consisting of natural adsorbents, GO/MXene-coated cellulose filters working on gravity-driven filtration | SDI, pH, TDS, conductivity, salinity, COD, BOD, TSS, turbidity, total hardness, MPN | - SDI = 2.6<br>- Satisfactory reduction in all the tested parameters<br>- Partial desalination up to 17.7% along with the pretreatment | - No energy requirement<br>- Cost-effective<br>- Simple and scalable<br>- Dual functioning | - Comparatively low water flux<br>- Components of the hybrid filter need to be replaced regularly | Present work |

**Table S2.** Comparison of the present study with similar seawater pretreatment studies.

| Sample                                | pH   | TDS (PPT) | Conductivity (mS/cm) | Salinity (PPT) | Decrease in salinity (%) |
|---------------------------------------|------|-----------|----------------------|----------------|--------------------------|
| Unfiltered seawater                   | 7.97 | 36.3      | 48.01                | 34.4           | ---                      |
| Filtered through hybrid filters with: |      |           |                      |                |                          |
| Uncoated cellulose filter             | 7.94 | 35.2      | 47.82                | 34.1           | 0.87                     |
| 0.25 mg/mL GO-coated filter           | 7.86 | 33.6      | 46.68                | 33.4           | 2.91                     |
| 0.50 mg/mL GO-coated filter           | 7.54 | 31.8      | 44.93                | 31.9           | 7.27                     |

|                                                          |      |      |       |      |       |
|----------------------------------------------------------|------|------|-------|------|-------|
| 0.75 mg/mL GO-coated filter                              | 7.33 | 30.4 | 43.04 | 30.2 | 12.21 |
| 1.00 mg/mL GO-coated filter                              | 7.10 | 29.1 | 41.20 | 28.3 | 17.73 |
| 0.25 mg/mL Ti <sub>3</sub> C <sub>2</sub> -coated filter | 7.90 | 34.0 | 47.56 | 34.0 | 1.16  |
| 0.50 mg/mL Ti <sub>3</sub> C <sub>2</sub> -coated filter | 7.76 | 33.4 | 46.24 | 33.1 | 3.77  |
| 0.75 mg/mL Ti <sub>3</sub> C <sub>2</sub> -coated filter | 7.61 | 32.9 | 44.11 | 32.5 | 5.52  |
| 1.00 mg/mL Ti <sub>3</sub> C <sub>2</sub> -coated filter | 7.43 | 31.8 | 43.19 | 31.1 | 9.59  |

**Table S3.** Water quality parameters of seawater before and after the filtration

## References:

- [1] L. F. Greenlee, D. F. Lawler, B. D. Freeman, B. Marrot, and P. Moulin, "Reverse osmosis desalination: Water sources, technology, and today's challenges," *Water Res.*, vol. 43, no. 9, pp. 2317–2348, May 2009, doi: 10.1016/j.watres.2009.03.010.
- [2] N. M. Farhat, C. Christodoulou, P. Placotas, B. Blankert, O. Sallangos, and J. S. Vrouwenvelder, "Cartridge filter selection and replacement: Optimization of produced water quantity, quality, and cost," *Desalination*, vol. 473, p. 114172, Jan. 2020, doi: 10.1016/j.desal.2019.114172.
- [3] C. Cordier *et al.*, "Removal of pathogens by ultrafiltration from sea water," *Environ. Int.*, vol. 142, p. 105809, Sept. 2020, doi: 10.1016/j.envint.2020.105809.
- [4] B. Wu *et al.*, "Gravity-driven microfiltration pretreatment for reverse osmosis (RO) seawater desalination: Microbial community characterization and RO performance," *Desalination*, vol. 418, pp. 1–8, Sept. 2017, doi: 10.1016/j.desal.2017.05.024.
- [5] S.-H. Kim, C.-S. Min, and S. Lee, "Application of dissolved air flotation as pretreatment of seawater desalination," *Desalination Water Treat.*, vol. 33, no. 1–3, pp. 261–266, Sept. 2011, doi: 10.5004/dwt.2011.2650.
- [6] N. Lior, Ed., "Frontmatter," in *Advances in Water Desalination*, 1st ed., Wiley, 2012. doi: 10.1002/9781118347737.fmatter.
- [7] S. Lim and Y. C. Kim, "Optimization of pilot-scale re-mineralization by calcite dissolution using sulfuric acid for seawater desalination processes," *Environ. Sci. Water Res. Technol.*, vol. 9, no. 2, pp. 620–629, 2023.
- [8] A. Al-Ashhab, A. Sweity, L. Al-Hadidi, M. Herzberg, and Z. Ronen, "Antiscalants Used in Seawater Desalination: Biodegradability and Effects on Microbial Diversity," *Microorganisms*, vol. 10, no. 8, p. 1580, Aug. 2022, doi: 10.3390/microorganisms10081580.
- [9] S. Brover, Y. Lester, A. Brenner, and E. Sahar-Hadar, "Optimization of ultrafiltration as pre-treatment for seawater RO desalination," *Desalination*, vol. 524, p. 115478, Feb. 2022, doi: 10.1016/j.desal.2021.115478.
- [10] K. T. Chua, M. N. A. Hawlader, and A. Malek, "Pretreatment of seawater: Results of pilot trials in Singapore," *Desalination*, vol. 159, no. 3, pp. 225–243, Nov. 2003, doi: 10.1016/S0011-9164(03)90075-0.

- [11] B. Vital, E. V. Torres, T. Sleutels, M. C. Gagliano, M. Saakes, and H. V. M. Hamelers, "Fouling fractionation in reverse electrodialysis with natural feed waters demonstrates dual media rapid filtration as an effective pre-treatment for fresh water," *Desalination*, vol. 518, p. 115277, Dec. 2021, doi: 10.1016/j.desal.2021.115277.
- [12] T. Altmann, A. Rousseva, J. Vrouwenvelder, M. Shaw, and R. Das, "Effectiveness of ceramic ultrafiltration as pretreatment for seawater reverse osmosis," *Desalination*, vol. 564, p. 116781, Oct. 2023, doi: 10.1016/j.desal.2023.116781.
- [13] L. Ranieri, R. E. Putri, N. Farhat, J. S. Vrouwenvelder, and L. Fortunato, "Gravity-Driven Membrane as seawater desalination pretreatment: Understanding the role of membrane biofilm on water production and AOC removal," *Desalination*, vol. 549, p. 116353, Mar. 2023, doi: 10.1016/j.desal.2022.116353.
- [14] D. Lee, T. Yoon, B. H. Lee, H. Son, Y. Baek, and Y. Lee, "Can prechlorination improve the permeate flux and water quality of gravity-driven membrane (GDM) filtration?," *J. Clean. Prod.*, vol. 368, p. 133203, Sept. 2022, doi: 10.1016/j.jclepro.2022.133203.
- [15] T. Yadaï and Y. Suzuki, "Development of softening and ballasted flocculation as a pretreatment process for seawater desalination through a reverse osmosis membrane," *Npj Clean Water*, vol. 6, no. 1, p. 7, Feb. 2023, doi: 10.1038/s41545-023-00226-0.
- [16] J. J. Lee *et al.*, "Novel pre-treatment method for seawater reverse osmosis: Fibre media filtration," *Desalination*, vol. 250, no. 2, pp. 557–561, Jan. 2010, doi: 10.1016/j.desal.2009.09.023.
- [17] B. A. Abdelkader, M. A. Antar, T. Laoui, and Z. Khan, "Development of graphene oxide-based membrane as a pretreatment for thermal seawater desalination," *Desalination*, vol. 465, pp. 13–24, Sept. 2019, doi: 10.1016/j.desal.2019.04.028.
- [18] B. Wu *et al.*, "Optimization of gravity-driven membrane (GDM) filtration process for seawater pretreatment," *Water Res.*, vol. 93, pp. 133–140, Apr. 2016, doi: 10.1016/j.watres.2016.02.021.
- [19] J. J. Lee *et al.*, "Hybrid filtration method for pre-treatment of seawater reverse osmosis (SWRO)," *Desalination*, vol. 247, no. 1, pp. 15–24, Oct. 2009, doi: 10.1016/j.desal.2008.12.008.
- [20] S. Jeong, Y. J. Choi, T. V. Nguyen, S. Vigneswaran, and T. M. Hwang, "Submerged membrane hybrid systems as pretreatment in seawater reverse osmosis (SWRO): Optimisation and fouling mechanism determination," *J. Membr. Sci.*, vol. 411–412, pp. 173–181, Sept. 2012, doi: 10.1016/j.memsci.2012.04.029.
